# Supplementary material
Source: publisher site journal article supplement (https://www.dovepress.com/article/221643)
Supplement: Supplementary file 1 [file get_supplementary_file.php]

**Supplementary Table 1. Sequences of primers for PCR amplification of HOXC8 cDNA fragments**

| Gene | Forward | Reverse |
| --- | --- | --- |
| HOXC8(116-bp) | 5′-TAGCTGCCACGGAGACGC-3′ | 5′-CGGAGGATTTACAGTCGGGAT-3′ |
| GAPDH(258-bp) | 5′-AGAAGGCTGGGGCTCATTTG-3′ | 5′-AGGGGCCATCCACAGTCTTC-3′ |

**Supplementary Table2. Three sets of primer sequences for the ASH2L-siRNA**

| Gene | Forward(5′-3′) | Reverse(5′-3′) | Product length (bp) |
| --- | --- | --- | --- |
| Fragment1 | GUCUACUAGUGGGAAUUUATT | UAAAUUCCCACUAGUAGACTT | 741 |
| Fragment2 | GCCAGCACAUACAAAGAUTT | AUCUUUGUAUGUGUCUGGCTT | 1412 |
| Fragment2 | CUCCGAAGGAUCUCACUUATT | UAAGUGAGAUCCUUCGGAGTT | 1664bp |
| negative control | UUCUCCGAACGUGUCACGUTT | ACGUGACACGUUCGGAGAATT |  |

**Supplementary Table3. The primer sequences of ASH2L and HOXC8**

| Gene | Forward(5′-3′) | Reverse(5′-3′) | Product length (bp) |
| --- | --- | --- | --- |
| Homo ASH2L | ATGTAAGCAGCACGAGGAAGG | AGAATGGGAGCAATAGGAAAGC | 91 |
| Homo HOXC8 | CCGCCAATCAAGAACTATGGAGTC | GGAATGTATCACTGCTCTGCCTG | 116 |
| β-Actin | TGACGTGGACATCCGCAAAG | CTGGAAGGTGGACAGCG |  |

**Supplementary Table 4a. The primers sequence of HOXC8 promoter region.**

| Gene | Forward(5-3′) | Reverse(5-3′) | Product length (bp) |
| --- | --- | --- | --- |
| Homo HOXC8 | TAGCTGCCACGGAGACGC | CGGAGGATTTACAGTCGGGAT | 116 |
| Homo GAPDH | AGAAGGCTGGGGCTCATTTG | AGGGGCCATCCACAGTCTTC | 258 |

**Supplementary Table 4b. The primers sequence of MLL，BPTF，RBBP5，WDR5 gene.**

| Gene | Forward(5-3′) | Reverse(5-3′) | Product length (bp) |
| --- | --- | --- | --- |
| MLL | TCCCACCTTCCCTGGAGTAA | TCTTTGTGGCTTGCTGAAACG | 134 |
| BPTF | GGCTGTGATCGGTGTCAGAA | GAACGGAGCACCCTCTTCAA | 176 |
| RBBP5 | CGGATGCAGTCCAAACCTCC | GATTGCTCCTCCTGCTTTTGAT | 230 |
| WDR5 | TCTCCCCGAACGGCAAATAC | TGTGGCCAGTGTACGTCTTC | 102 |

**Supplementary Table 4c. The primers of HOXC8 promoter sequences**

| primer | PCR product sequence |
| --- | --- |
| 0k | CAGACCTGCCCAGCCCCCAGCCCACCAGCCCAGCCCAGTCCCGGGGAGCCAGCTGATGA |
| -2k | AGAGTTCTGGGTGTCTAGAGTTTGGGCAGCTCCTGAGATGGGGGTGGGATTCCCCAAATGCAGGGA |
| -3k | GTAGAGGCGGCGGTGCCCCGGGCCGCCCTGGCCGCACTGACATTTGAGGCCC |
| 1.4k | GGAGCGATAAGCGACAGTTCCGGCGGGGATGGCCCATGATTTATTTGCTGGTCTCCAA |


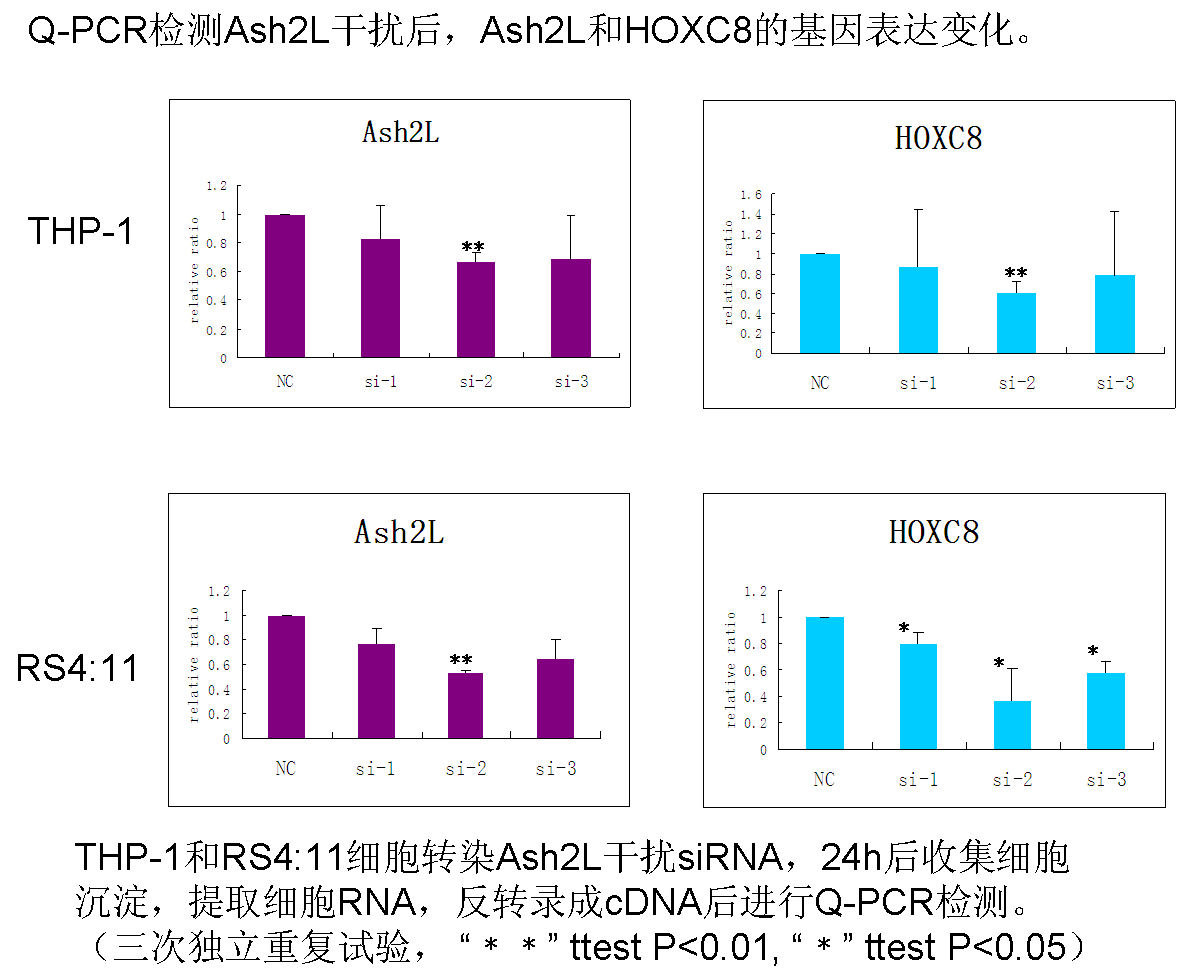
**Supplemental figure1. Expression changes of ASH2L and HOXC8 after quantitative PCR detection of ASH2L interference.**经三次独立重复试验，均出现下调， ASH2L 在 THP-1 细胞的 2 号样本以及 RSH:1 细胞的 2 号样本 ASH2L 明显下调（ p<0.01 ）， HOXC8 基因在 THP-1 细胞的 2 号样本以及 RSH:1All three independent trials showed that expressions of both genes were down-regulated. ASH2L was significantly down-regulated in sample No. 2 of THP-1 cells and sample No. 2 of RSH:1 cells (p<0.01); HOXC8 was significantly down-regulated (p<0.01) in sample No. 2 of THP-1 cells and sample No. 1 , 2 and 3 of RSH:1 cells


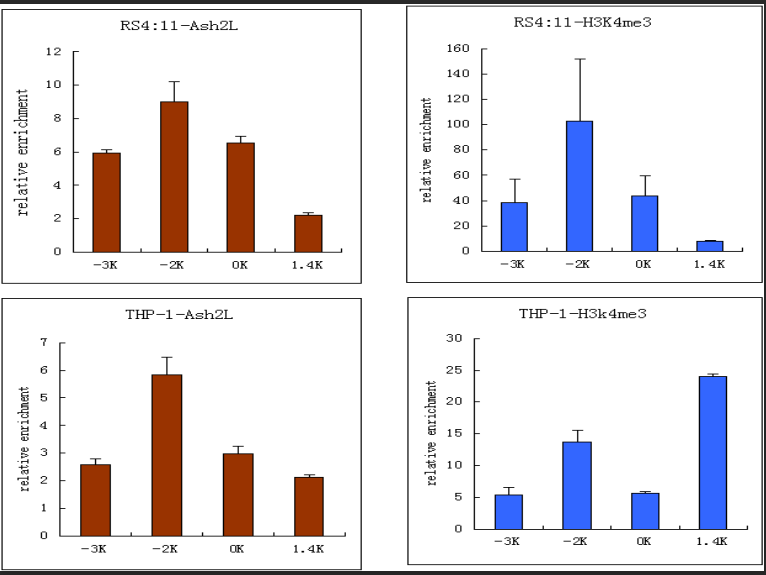


**Supplemental figure 2. The expression of HOXC8 promoter region in RS4:11 and THP-1 cells before siRNA-ASH2L**


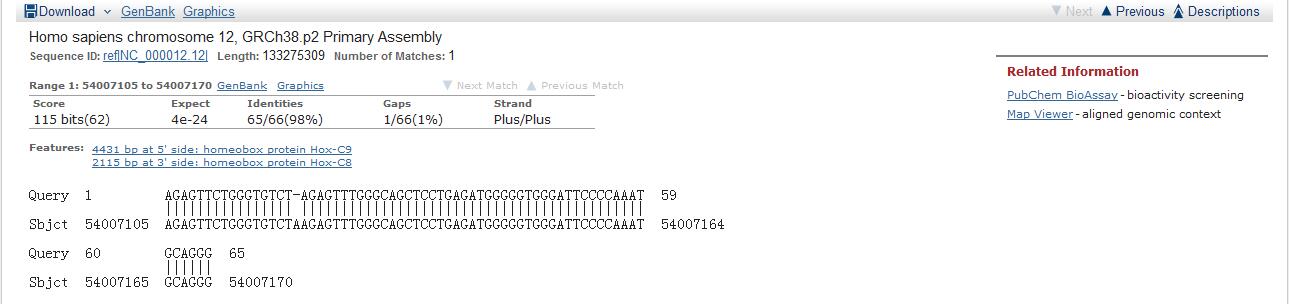


-2k

**Supplemental figure 3a. The comparison result of sequencing primers in -2k**


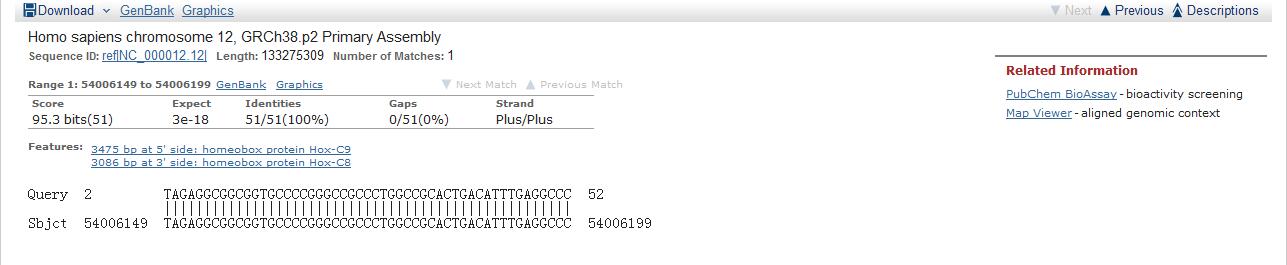


-3k

**Supplemental figure 3b. The comparison result of sequencing primers in -2k**


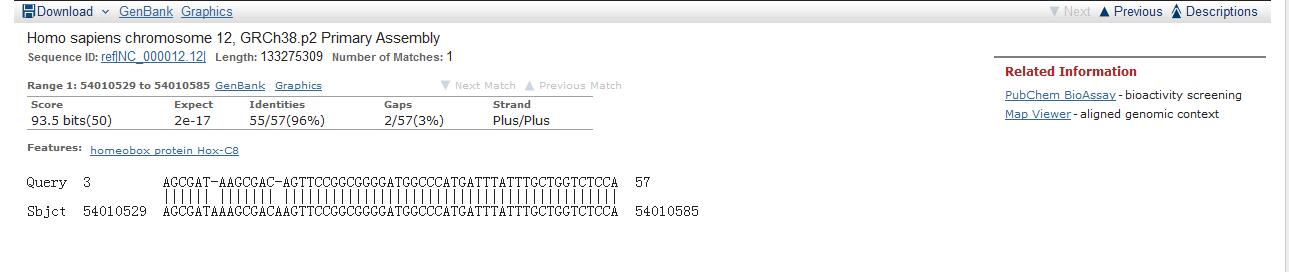


-1.4k

**Supplemental figure 3c. The comparison result of sequencing primers in -2k**

**
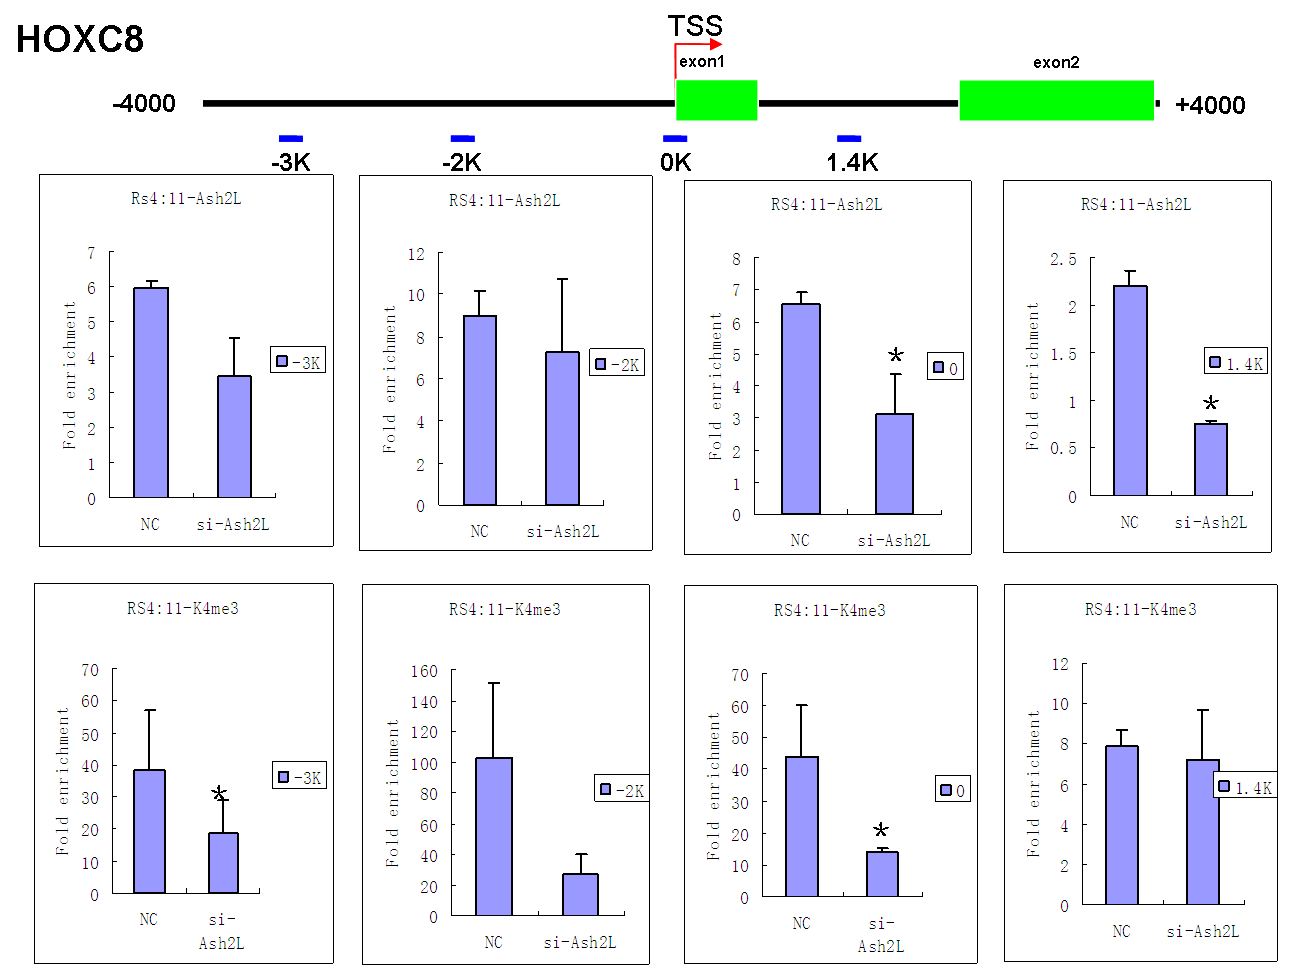

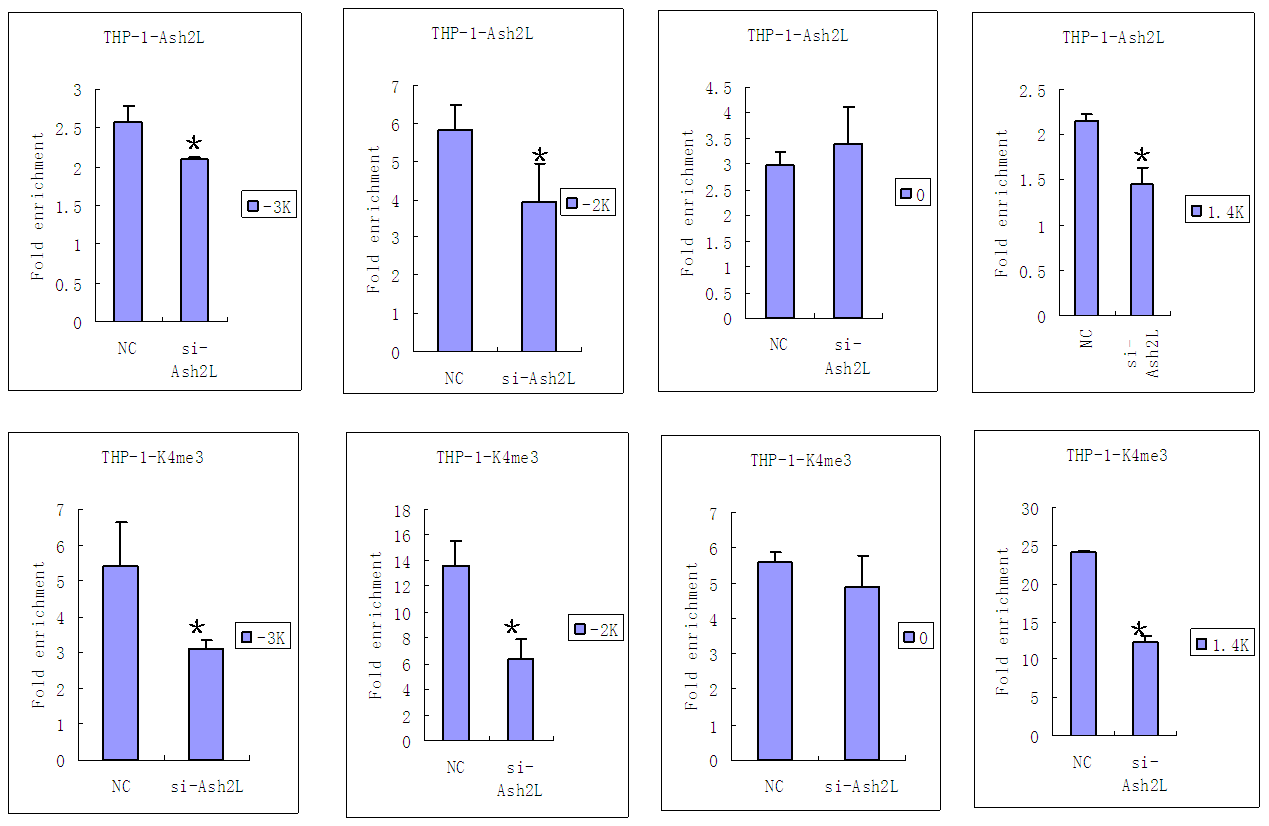
**

**Supplemental Figure 4.The H3K4-me3 Modification in HOXC8 Promoter Region after siRNA -ASH2L**


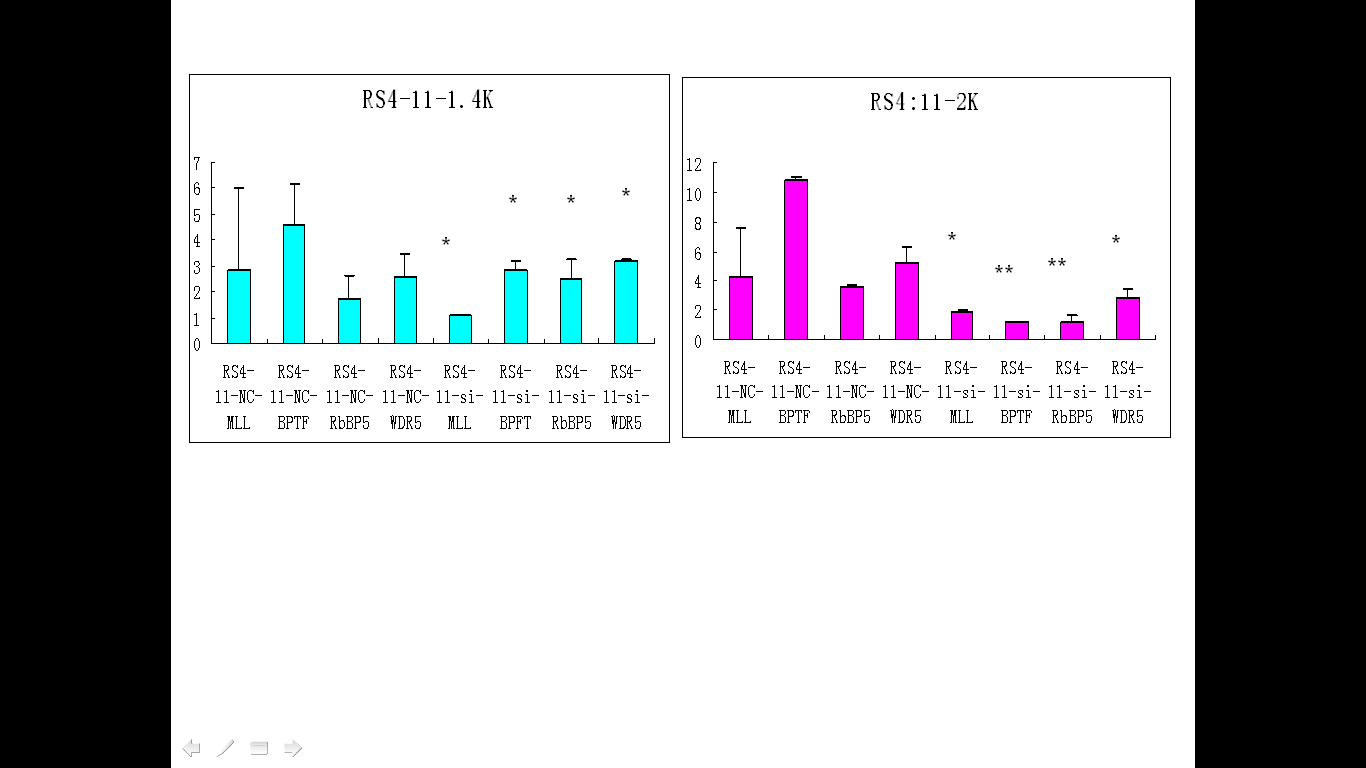

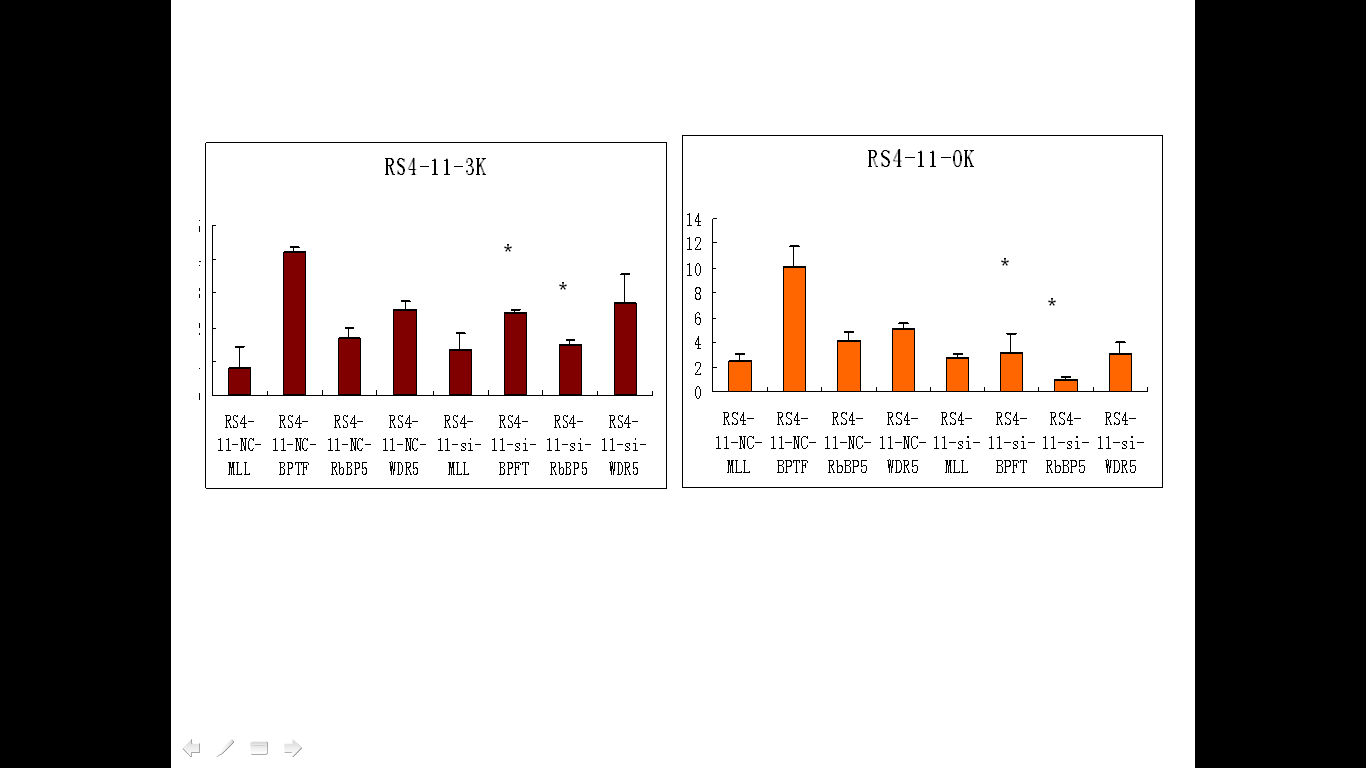

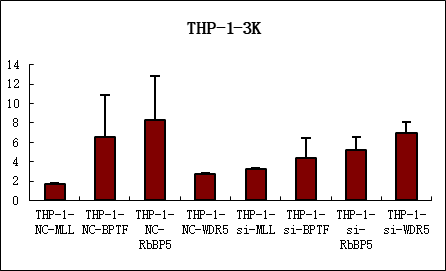


*

*

**Supplemental Figure 5.The modification of H3K4-me3 in HOXC8 Promoter Region after siRNA-ASH2L**
